# Supplementary material for: Molecular mechanisms that stabilize short term synaptic plasticity during presynaptic homeostatic plasticity
Source: eLife journal article supplement (doi:10.7554/elife.40385), 2018-11-13
Supplement: supp [file elife-40385-supp-v1.zip]

Archive with 3 entries (3 files):
- elife_poa_e40385_Supplementary_File_1.docx
- elife_poa_e40385_Transparent_Reporting_File.docx
- elife_poa_e40385_Figure_1_figure_supplement_1.pdf
