# Supplementary material for: Molecular mechanisms that stabilize short term synaptic plasticity during presynaptic homeostatic plasticity
Source: eLife journal article supplement (doi:10.7554/elife.40385), 2018-11-13
Supplement: supp [file elife-40385-supp-v1.zip › elife_poa_e40385_Figure_1_figure_supplement_1.pdf]

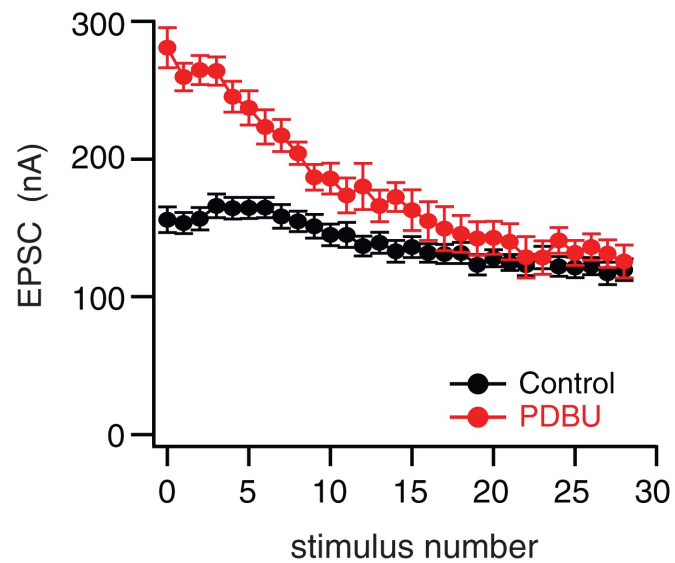

**Figure 1\_Supplemental Figure 1.** PdBu-dependent potentiation converges to wild type steady state during a prolonged stimulus train. Average peak amplitudes of 60 Hz trains in the absence (black) and presence (red) of PdBu (n=6 for control, n=4 for PdBu, data are mean  $\pm$  SEM ). The average of the last three data points at the end of the stimulus trains are statistically similar ( $p>0.1$ ; Student's t-test, two tails).
